# Supplementary material for: Cu3P nanoparticle-reduced graphene oxide hybrid: an efficient electrocatalyst to realize N2-to-NH3 conversion under ambient conditions
Source: Royal Society of Chemistry journal article supplement (doi:10.1039/d0cc04374e), 2020-01-01
Supplement: d0cc04374e1.pdf [file d0cc04374e1.pdf]

## Electronic Supplementary Information

### Experimental section

*Materials:* GO, copper sulfate ( $\text{CuSO}_4$ ), ammonium chloride ( $\text{NH}_4\text{Cl}$ ), hydrazine hydrate ( $\text{N}_2\text{H}_4\cdot\text{H}_2\text{O}$ ), salicylic acid ( $\text{C}_7\text{H}_6\text{O}_3$ ), sodium citrate ( $\text{C}_6\text{H}_5\text{Na}_3\text{O}_7$ ), sodium hypochlorite ( $\text{NaClO}$ ), sodium hydroxide ( $\text{NaOH}$ ), hydrochloric acid ( $\text{HCl}$ ), ethanol ( $\text{CH}_3\text{CH}_2\text{OH}$ ), sodium monophosphate ( $\text{NaH}_2\text{PO}_2$ ) and carbon paper (CP) were bought from Beijing Chemical Corporation. Para-(dimethylamino) benzaldehyde ( $\text{C}_9\text{H}_{11}\text{NO}$ ), sodium nitroferricyanide (III) dihydrate ( $\text{Na}_2\text{Fe}(\text{CN})_5\text{NO}\cdot 2\text{H}_2\text{O}$ ), and Nafion were purchased from Aladdin Ltd. (Shanghai, China). The water used throughout all experiments was purified through a Millipore system.

*Preparation of  $\text{Cu}_3\text{P-rGO}$ :* Aqueous solution of  $\text{CuSO}_4$  (100 mL, 0.05 M) and  $\text{NaOH}$  (40 mL, 0.25 M) was dissolved in homogeneous GO aqueous dispersion (1mg/mL) under stirring for 2 h. After that, the product was separated by centrifuging, and further washing was done with Millipore water. Finally, the nanocomposite sample was freeze-dried for 24 h. The product and  $\text{NaH}_2\text{PO}_2$  (mass ratio 1: 5) were put into two boats separately and then annealed at 300 °C for 2 h under argon flow with a ramping rate of 2 °C  $\text{min}^{-1}$ . In addition,  $\text{Cu}_3\text{P}$  was also prepared according to the same method only without adding GO. In addition,  $\text{Cu-rGO}$  was also prepared through annealing product at 300 °C for 2 h under  $\text{Ar}/\text{H}_2$  atmosphere (volume ratio = 9:1) atmosphere without adding  $\text{NaH}_2\text{PO}_2$ .

*Preparation of  $\text{Cu}_3\text{P-rGO}/\text{CP}$  electrode:* 10 mg  $\text{Cu}_3\text{P-rGO}$  powders and 40  $\mu\text{L}$  of Nafion solution (5 wt%) were dispersed in 960  $\mu\text{L}$  mixed solution containing 720  $\mu\text{L}$  ethanol and 240  $\mu\text{L}$   $\text{H}_2\text{O}$  by 2 h sonication to form a homogeneous ink. Then, 10  $\mu\text{L}$   $\text{Cu}_3\text{P-rGO}$  was loaded on a CP with area of 1 x 1  $\text{cm}^2$  and dried under ambient condition.

*Characterizations:* X-ray diffraction (XRD) analysis was performed using a LabX XRD-6100 X-ray diffractometer with  $\text{Cu K}\alpha$  radiation ( $\lambda = 1.5418 \text{ \AA}$ ) at 40 kV and 40 mA. Scanning electron microscope (SEM) measurements were recorded on a XL30 ESEM FEG scanning electron microscope at an accelerating voltage of 20 kV.

Transmission electron microscopy (TEM) images were obtained from a Zeiss Libra 200FE transmission electron microscope operated at 200 kV. X-ray photoelectron spectroscopy (XPS) measurements were performed on an ESCALABMK II X-ray photoelectron spectrometer using Mg as the exciting source. The absorbance data of spectrophotometer were measured on SHIMADZU UV-2700 ultraviolet-visible (UV-Vis) spectrophotometer.

*Electrochemical measurements:* Electrochemical measurements were performed with a CHI 660E electrochemical analyzer (CH Instruments, Inc., Shanghai) using a standard three-electrode system using Cu<sub>3</sub>P-rGO/CP loaded on carbon paper (Cu<sub>3</sub>P-rGO/CP; Cu<sub>3</sub>P-rGO loading: 0.1 mg cm<sup>-2</sup>) as the working electrode, graphite rod as the counter electrode, and saturated Ag/AgCl electrode as the reference electrode. The potentials reported in this work were converted to reversible hydrogen electrode (RHE) scale via calibration with the following equation:  $E \text{ (vs. RHE)} = E \text{ (vs. Ag/AgCl)} + 0.059 \times \text{pH} + 0.197 \text{ V}$ . Prior to use, the electrochemical cell was immersed in 0.05 M H<sub>2</sub>SO<sub>4</sub> solution for 24 h and then washed with deionized water to eliminate contaminants. In the process of electrochemical measurement, N<sub>2</sub> (99.999%) was firstly bubbled into 0.05 M H<sub>2</sub>SO<sub>4</sub> to remove the possible NH<sub>3</sub>, then bubbled into a Cu impurity trap, which composed of 2 g Cu-Zn-Al oxide catalyst to remove the possible NO<sub>x</sub> contaminants, and finally bubbled up at the bottom of the cathodic compartment to saturate the 0.1 M HCl (the HCl electrolyte was purged with N<sub>2</sub> for 0.5 h before the measurement). All experiments were carried out at room temperature. For electrochemical N<sub>2</sub> reduction, chrono-amperometry tests were conducted in N<sub>2</sub>-saturated 0.1 M HCl solution.

*Determination of NH<sub>3</sub>:* The produced NH<sub>3</sub> was spectrophotometrically determined by the indophenol blue method.<sup>1</sup> In detail, 2 mL electrolyte was taken from the cathodic chamber, and then 2 mL of 1 M NaOH solution containing 5% salicylic acid and 5% sodium citrate was added into this solution. Subsequently, 1 mL of 0.05 M NaClO and 0.2 mL of 1% C<sub>5</sub>FeN<sub>6</sub>Na<sub>2</sub>O·2H<sub>2</sub>O were added into the above solution. After standing at room temperature for 2 h, UV-Vis absorption spectrum was measured at a wavelength of 655 nm. The concentration-absorbance curve was calibrated using

standard  $\text{NH}_4^+$  solution with a series of concentrations. The fitting curve ( $y = 0.432x + 0.062$ ,  $R^2 = 0.999$ ) shows good linear relation of absorbance value with  $\text{NH}_4^+$  concentration.

*Determination of  $\text{N}_2\text{H}_4$ :*  $\text{N}_2\text{H}_4$  in the electrolyte was estimated by the method of Watt and Chrisp.<sup>2</sup> The mixture solution of 5.99 g  $\text{C}_9\text{H}_{11}\text{NO}$ , 30 mL HCl and 300 mL ethanol was used as a color reagent. Typically, 5 mL electrolyte was removed from the electrochemical reaction vessel and added into 5 mL above prepared color reagent 10 min at room temperature. Moreover, the absorbance of the resulting solution was measured at a wavelength of 455 nm. The obtained calibration curve of  $\text{N}_2\text{H}_4$  is  $y = 0.71x + 0.035$ ,  $R^2 = 0.999$ .

*Calculations of  $\text{NH}_3$  yield rate and FE:*  $\text{NH}_3$  yield was calculated using the following equation:

$$\text{NH}_3 \text{ yield} = [\text{NH}_4^+] \times V / (m_{\text{cat.}} \times t)$$

FE was calculated according to following equation:

$$\text{FE} = 3 \times F \times [\text{NH}_4^+] \times V / (18 \times Q)$$

Where  $[\text{NH}_4^+]$  is the measured  $\text{NH}_4^+$  concentration; V is the volume of the cathodic reaction electrolyte; t is the potential applied time;  $m_{\text{cat.}}$  is the loaded quality of catalyst; F is the Faraday constant; and Q is the quantity of applied electricity.

*Details of Density Functional Theory (DFT) Calculations:* Density functional theory (DFT) was carried out by the Vienna ab initio Simulation Package (VASP).<sup>3,4</sup> The ion-electron interactions were described by Projector augmented wave (PAW)<sup>5</sup> method. The generalized gradient approximation (GGA) in the Perdew-Burke-Ernzerhof (PBE) form<sup>6,7</sup> was employed. A cut-off energy for plane wave basis set was set to 400 eV and geometry optimizations were performed until the residual force on each atom becomes less than 0.03 eV/Å. A  $(3 \times 3 \times 1)$  Gamma-center mesh k-point was used for the calculation, and more than 15 Å of vacuum in z-direction was included for the slab model to avoid the interaction between two periodic units. The optimized  $\text{Cu}_3\text{P}$  (100) surface was shown in Fig. S8. The adsorption energies ( $E_{\text{ads}}$ ) of the NRR intermediates were determined by  $E_{\text{ads}} = E_{\text{tot}} - E_{\text{slab}} - E_{\text{adsorbate}}$ , where  $E_{\text{tot}}$ ,  $E_{\text{slab}}$  and  $E_{\text{adsorbate}}$  represent the total energies of the species adsorbed slab system, the

clean slab, and the adsorbate, respectively. The calculations of Gibbs free energy change ( $\Delta G$ ) was computed by  $\Delta G = \Delta E + \Delta E_{ZPE} - T\Delta S + neU$  for each step, which is based on the computational hydrogen electrode (CHE) model proposed by Nørskov *et al.*,<sup>8</sup> where  $\Delta E$  is the reaction energy directly obtained from DFT computation;  $\Delta E_{ZPE}$  and  $\Delta S$  are the changes in zero-point energies and entropy, respectively;  $T$  is the temperature, which is set to be 298.15 K in this work;  $n$  and  $U$  are the number of electrons transferred and the applied potential, respectively. In this study, the entropies of molecules in the gas phase were obtained from the NIST database.

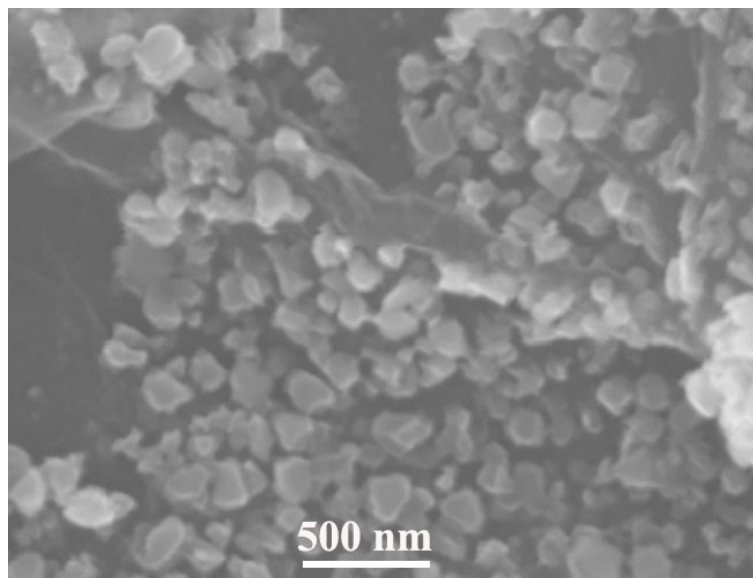

**Fig. S1.** SEM image of Cu<sub>3</sub>P-rGO.

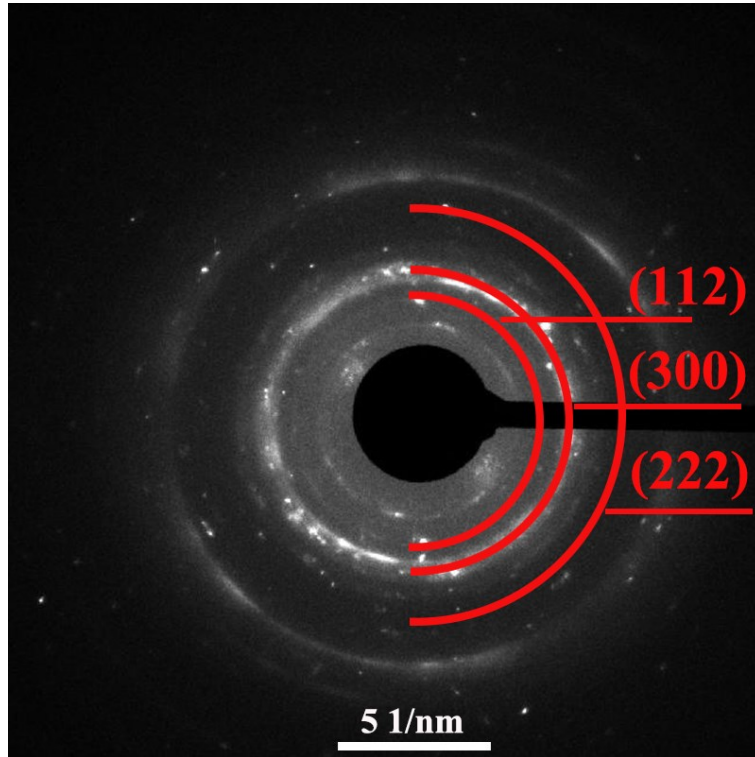

**Fig. S2.** SAED pattern taken from Cu<sub>3</sub>P-rGO.

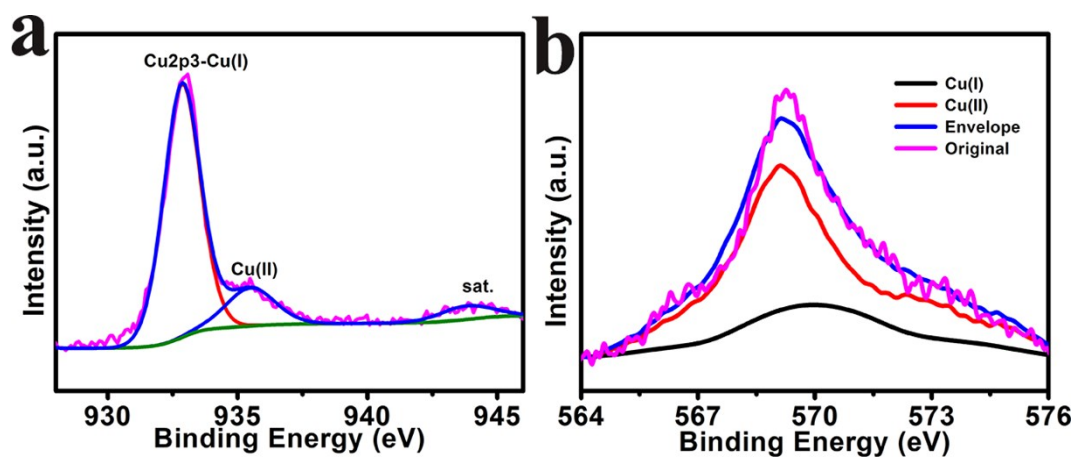

**Fig. S3.** (a) XPS spectrum of Cu<sub>3</sub>P-rGO and (b) Auger electron spectrum in the Cu 2p.

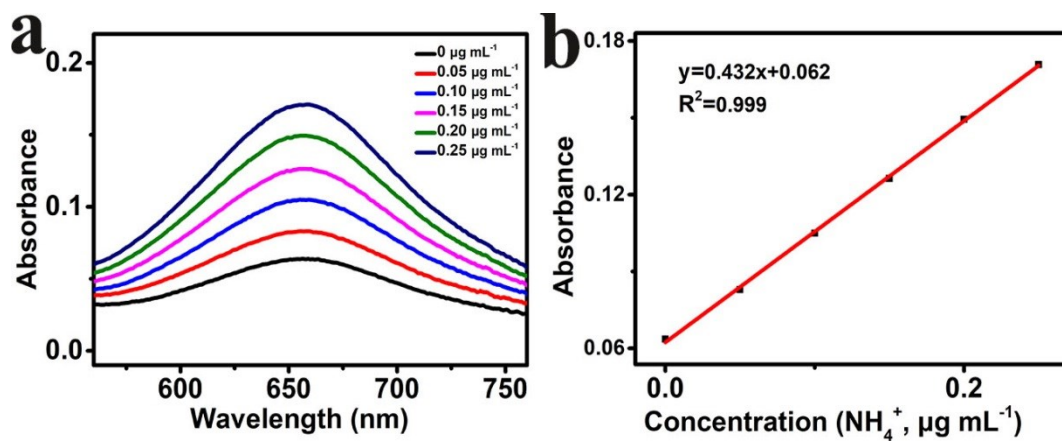

**Fig. S4.** (a) UV-Vis absorption spectra of indophenol assays with  $\text{NH}_4^+$  concentrations after incubated for 2 h at room temperature. (b) Calibration curve used for calculation of  $\text{NH}_4^+$  concentrations.



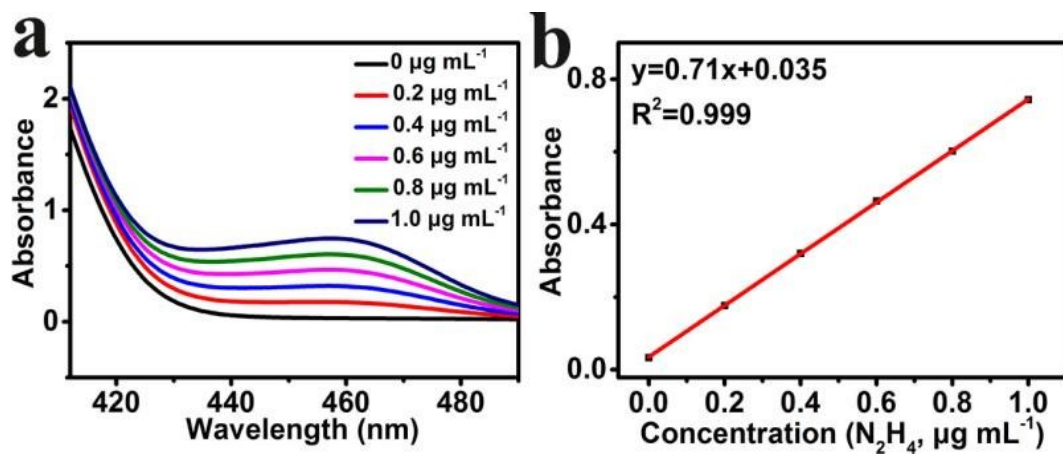

**Fig. S5.** (a) UV-Vis absorption spectra of various  $N_2H_4$  concentrations after incubated for 10 min at room temperature. (b) Calibration curve used for calculation of  $N_2H_4$  concentrations.

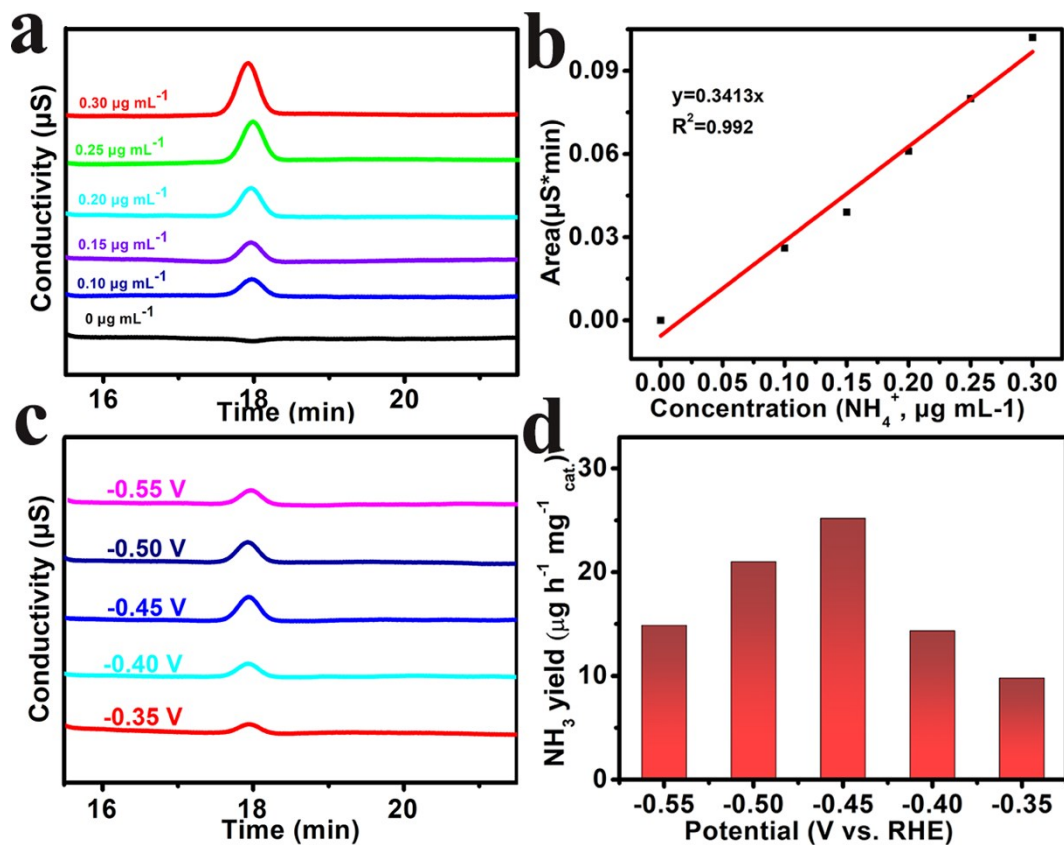

**Fig. S6.** (a) Ion chromatogram analysis for the  $\text{NH}_4^+$  ions. (b) Calibration curve used for estimation of  $\text{NH}_4^+$ . (c) Ion chromatogram data for the electrolytes at a series of potentials after electrolysis for 2 h. (d)  $\text{NH}_3$  yields for  $\text{Cu}_3\text{P-rGO/CP}$  at corresponding potentials.

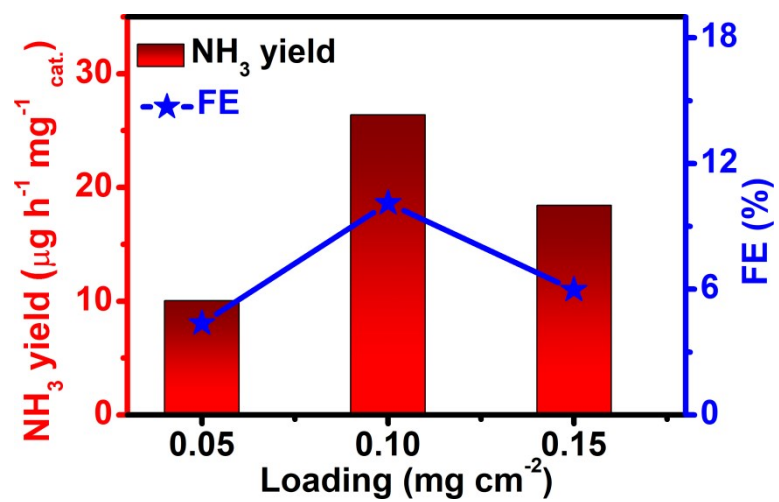

**Fig. S7.**  $\text{NH}_3$  yields and FEs for  $\text{Cu}_3\text{P-rGO/CP}$  at  $-0.45$  V with different loadings.

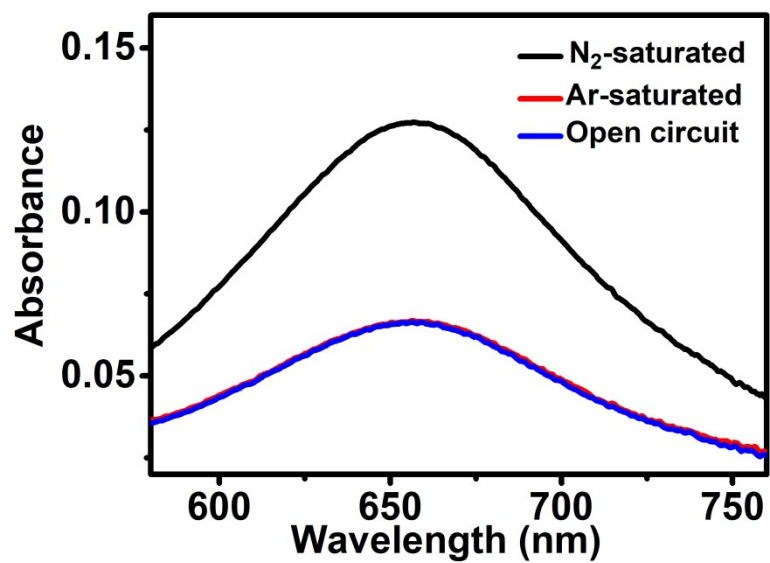

**Fig. S8.** UV-Vis absorption spectra of the electrolyte stained with indophenol indicator after charging at  $-0.45$  V for 2 h under different electrochemical conditions.

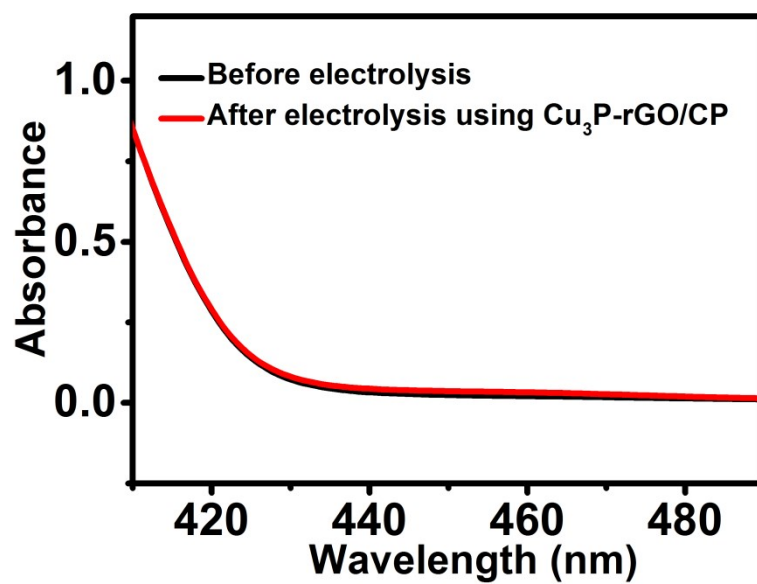

**Fig. S9.** UV-Vis absorption spectra of the electrolytes estimated by the method of Watt and Chrisp before and after 2 h electrolysis in N<sub>2</sub> atmosphere at -0.45 V.

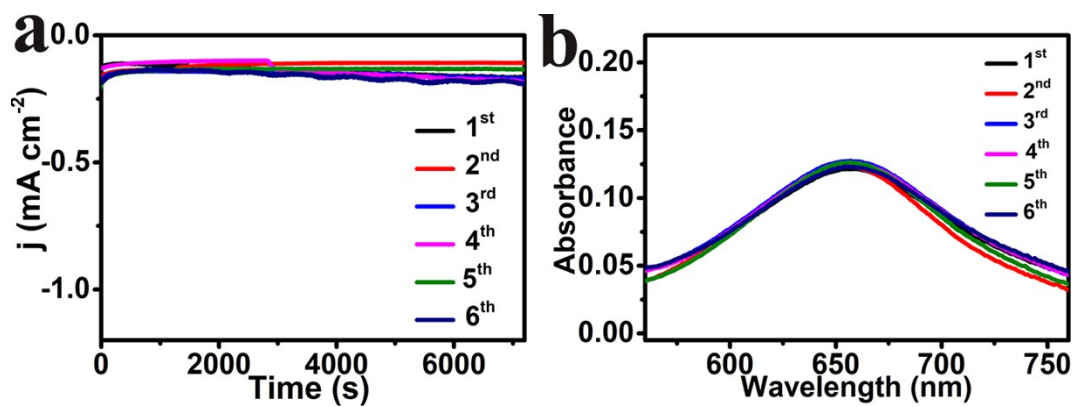

**Fig. S10.** (a) Time-dependent current density curves of Cu<sub>3</sub>P-rGO/CP at -0.45 V for continuous cycles. (b) UV-Vis absorption spectra of the electrolytes stained with NH<sub>3</sub> color agent for continuous cycles.

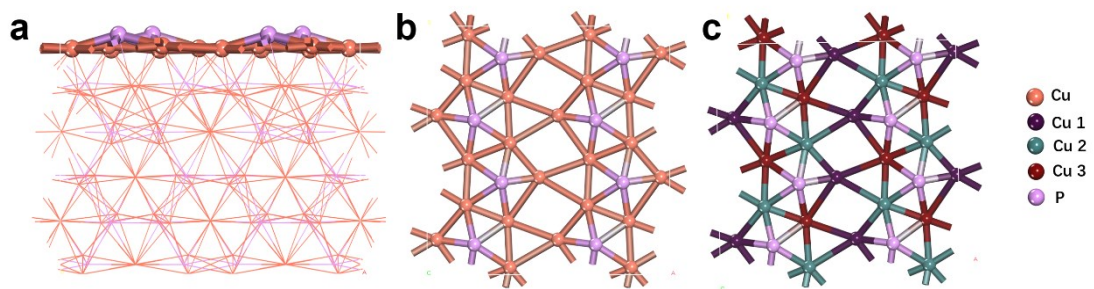

**Fig. S11.** Side views (a) and upper exposed surface (b-c) of the optimized  $\text{Cu}_3\text{P}$  (100) surface.

**Table S1.** Comparison of electrocatalytic N<sub>2</sub> reduction performance for Cu<sub>3</sub>P-rGO with other aqueous-based electrocatalysts under ambient conditions.

| Catalyst                                                         | Electrolyte                           | NH <sub>3</sub> yield                                     | FE (%) | Ref.      |
|------------------------------------------------------------------|---------------------------------------|-----------------------------------------------------------|--------|-----------|
| Cu <sub>3</sub> P-rGO                                            | 0.1 M HCl                             | 26.38 μg h <sup>-1</sup> mg <sup>-1</sup> <sub>cat.</sub> | 10.11  | This work |
| α-Au/CeO <sub>x</sub> -RGO                                       | 0.1 M HCl                             | 8.3 μg h <sup>-1</sup> mg <sup>-1</sup> <sub>cat.</sub>   | 10.1   | 9         |
| TA-reduced Au/TiO <sub>2</sub>                                   | 0.1 M HCl                             | 21.4 μg h <sup>-1</sup> mg <sup>-1</sup> <sub>cat.</sub>  | 8.11   | 10        |
| MoN NA/CC                                                        | 0.1 M HCl                             | 18.42 μg h <sup>-1</sup> cm <sup>-2</sup>                 | 1.15   | 11        |
| MoO <sub>3</sub>                                                 | 0.1 M HCl                             | 29.43 μg h <sup>-1</sup> mg <sup>-1</sup> <sub>cat.</sub> | 1.9    | 12        |
| VN/TM                                                            | 0.1 M HCl                             | 5.14 μg h <sup>-1</sup> cm <sup>-2</sup>                  | 2.25   | 13        |
| Bi <sub>4</sub> V <sub>2</sub> O <sub>11</sub> /CeO <sub>2</sub> | 0.1 M HCl                             | 23.21 μg h <sup>-1</sup> mg <sup>-1</sup> <sub>cat.</sub> | 10.16  | 14        |
| Mo <sub>2</sub> N                                                | 0.1 M HCl                             | 78.4 μg h <sup>-1</sup> mg <sup>-1</sup> <sub>cat.</sub>  | 4.5    | 15        |
| NPC                                                              | 0.05 M H <sub>2</sub> SO <sub>4</sub> | 23.8 μg h <sup>-1</sup> mg <sup>-1</sup> <sub>cat.</sub>  | 1.42   | 16        |
| Mo nanofilm                                                      | 0.01 M H <sub>2</sub> SO <sub>4</sub> | 1.89 μg h <sup>-1</sup> cm <sup>-2</sup>                  | 0.72   | 17        |
| Pd <sub>0.2</sub> Cu <sub>0.8</sub> /rGO                         | 0.1 M KOH                             | 2.8 μg h <sup>-1</sup> mg <sup>-1</sup> <sub>cat.</sub>   | 4.5    | 18        |
| Ru/C                                                             | 2.0 M KOH                             | 0.21 μg h <sup>-1</sup> cm <sup>-2</sup>                  | 0.28   | 19        |
| γ-Fe <sub>2</sub> O <sub>3</sub>                                 | 0.1 M KOH                             | 0.212 μg h <sup>-1</sup> mg <sup>-1</sup> <sub>cat.</sub> | 1.9    | 20        |
| Fe <sub>2</sub> O <sub>3</sub> -CNT                              | KHCO <sub>3</sub>                     | 0.22 μg h <sup>-1</sup> cm <sup>-2</sup>                  | 0.15   | 21        |
| CuO/RGO                                                          | 0.1 M Na <sub>2</sub> SO <sub>4</sub> | 11.02 μg h <sup>-1</sup> cm <sup>-2</sup>                 | 3.9    | 22        |
| TiO <sub>2</sub> -rGO                                            | 0.1 M Na <sub>2</sub> SO <sub>4</sub> | 15.13 μg h <sup>-1</sup> mg <sup>-1</sup> <sub>cat.</sub> | 3.3    | 23        |
| Fe <sub>2</sub> O <sub>3</sub> nanorods                          | 0.1 M Na <sub>2</sub> SO <sub>4</sub> | 15.9 μg h <sup>-1</sup> mg <sup>-1</sup> <sub>cat.</sub>  | 0.94   | 24        |
| dendritic Cu                                                     | 0.1 M HCl                             | 25.63 μg h <sup>-1</sup> mg <sup>-1</sup> <sub>cat.</sub> | 15.12  | 25        |



## References

- 1 D. Zhu, L. Zhang, R. E. Ruther and R. J. Hamers, *Nat. Mater.*, 2013, **12**, 836–841.
- 2 G. W. Watt and J. D. Chrisp, *Anal. Chem.*, 1952, **24**, 2006–2008.
- 3 G. Kresse and J. Furthmüller, *Phys. Rev. B*, 1996, **54**, 11169.
- 4 G. Kresse and D. Joubert, *Phys. Rev. B*, 1999, **59**, 1758.
- 5 P. E. Blöchl, *Phys. Rev. B*, 1994, **50**, 17953.
- 6 J. P. Perdew, J. Chevary, S. Vosko, K. A. Jackson, M. R. Pederson, D. Singh and C. Fiolhais, *Phys. Rev. B*, 1992, **46**, 6671.
- 7 J. P. Perdew and Y. Wang, *Phys. Rev. B*, 1992, **45**, 13244.
- 8 A. A. Peterson, F. Abild-Pedersen, F. Studt, J. Rossmeisl and J. K. Nørskov, *Energy Environ. Sci.*, 2010, **3**, 1311–1315.
- 9 S. Li, D. Bao, M. Shi, B. Wulan, J. Yan and Q. Jiang, *Adv. Mater.*, 2017, **29**, 1700001.
- 10 M. Shi, D. Bao, B. Wulan, Y. Li, Y. Zhang, J. Yan and Q. Jiang, *Adv. Mater.*, 2017, **29**, 1606550.
- 11 L. Zhang, X. Ji, X. Ren, Y. Luo, X. Shi, A. M. Asiri, B. Zheng and X. Sun, *ACS Sustainable Chem. Eng.*, 2018, **6**, 9550–9554.
- 12 J. Han, X. Ji, X. Ren, G. Cui, L. Li, F. Xie, H. Wang, B. Li and X. Sun, *J. Mater. Chem. A*, 2018, **6**, 12974–12977.
- 13 R. Zhang, Y. Zhang, X. Ren, G. Cui, A. M. Asiri, B. Zheng and X. Sun, *ACS Sustainable Chem. Eng.*, 2018, **6**, 9545–9549.
- 14 C. Lv, C. Yan, G. Chen, Y. Ding, J. Sun, Y. Zhou and G. Yu, *Angew. Chem., Int. Ed.*, 2018, **57**, 6073–6076.
- 15 X. Ren, G. Cui, L. Chen, F. Xie, Q. Wei, Z. Tian and X. Sun, *Chem. Commun.*, 2018, **54**, 8474–8477.
- 16 Y. Liu, Y. Su, X. Quan, X. Fan, S. Chen, H. Yu, H. Zhao, Y. Zhang and J. Zhao, *ACS Catal.*, 2018, **8**, 1186–1191.
- 17 D. Yang, T. Chen and Z. Wang, *J. Mater. Chem. A*, 2017, **5**, 18967–18971.

- 18 M. Shi, D. Bao, S. Li, B. Wulan, J. Yan and Q. Jiang, *Adv. Energy Mater.*, 2018, **8**, 1800124.
- 19 V. Kordali, G. Kyriacou and C. Lambrou, *Chem. Commun.*, 2000, **17**, 1673–1674.
- 20 J. Kong, A. Lim, C. Yoon, J. H. Jang, H. C. Ham, J. Han, S. Nam, D. Kim, Y. E. Sung, J. Choi and H. S. Park, *ACS Sustainable Chem. Eng.*, 2017, **5**, 10986–10995.
- 21 S. Chen, S. Perathoner, C. Ampelli, C. Mebrahtu, D. Su and G. Centi, *Angew. Chem., Int. Ed.*, 2017, **56**, 2699–2703.
- 22 F. Wang, Y. Liu, H. Zhang and K. Chu, *ChemCatChem*, 2019, **11**, 1441–1447.
- 23 X. Zhang, Q. Liu, X. Shi, A. M. Asiri, Y. Luo, X. Sun and T. Li, *J. Mater. Chem. A*, 2018, **6**, 17303–17306.
- 24 X. Xiang, Z. Wang, X. Shi, M. Fan and X. Sun, *ChemCatChem*, 2018, **10**, 4530–4535.
- 25 C. Li, S. Mou, X. Zhu, F. Wang, Y. Wang, Y. Qiao, X. Shi, Y. Luo, B. Zheng, Q. Li and X. Sun, *Chem. Commun.*, 2019, **55**, 14474–14477.
